# Supplementary material for: A triboelectric nanogenerator with synergistic complementary nanopatterns fabricated by block copolymer self-assembly
Source: Royal Society of Chemistry journal article supplement (doi:10.1039/d4ta00497c), 2024-01-01
Supplement: d4ta00497c1.pdf [file d4ta00497c1.pdf]

## Supplementary Information for

# Triboelectric nanogenerator with synergistic complementary nanopatterns by block copolymer self-assembly

*Seong-Yun Yun<sup>a,†</sup>, Min Hyeok Kim<sup>b,†</sup>, Geon Gug Yang<sup>b</sup>, Hee Jae Choi<sup>b</sup>, Do-Wan Kim<sup>a</sup>, Yang-  
Kyu Choi<sup>a,c,\*</sup>, and Sang Ouk Kim<sup>b,c,\*</sup>*

<sup>a</sup> School of Electrical Engineering, Korea Advanced Institute of Science and Technology (KAIST), 291 Daehak-ro, Yuseong-gu, Daejeon 34141, Republic of Korea

<sup>b</sup> National Creative Research Initiative Center for Multi-dimensional Directed Nanoscale Assembly, Department of Materials Science and Engineering, KAIST, 291 Daehak-ro, Yuseong-gu, Daejeon 34141, Republic of Korea

<sup>c</sup> KAIST Institute for Nanocentury, KAIST, 291 Daehak-ro, Yuseong-gu, Daejeon 34141, Republic of Korea

*†These authors equally contributed to this work.*

\* Address correspondence to [ykchoi@ee.kaist.ac.kr](mailto:ykchoi@ee.kaist.ac.kr)

\* Address correspondence to [sangouk@kaist.ac.kr](mailto:sangouk@kaist.ac.kr)

# 1. Fabrication procedure of nanopatterns with BCP self-assembly

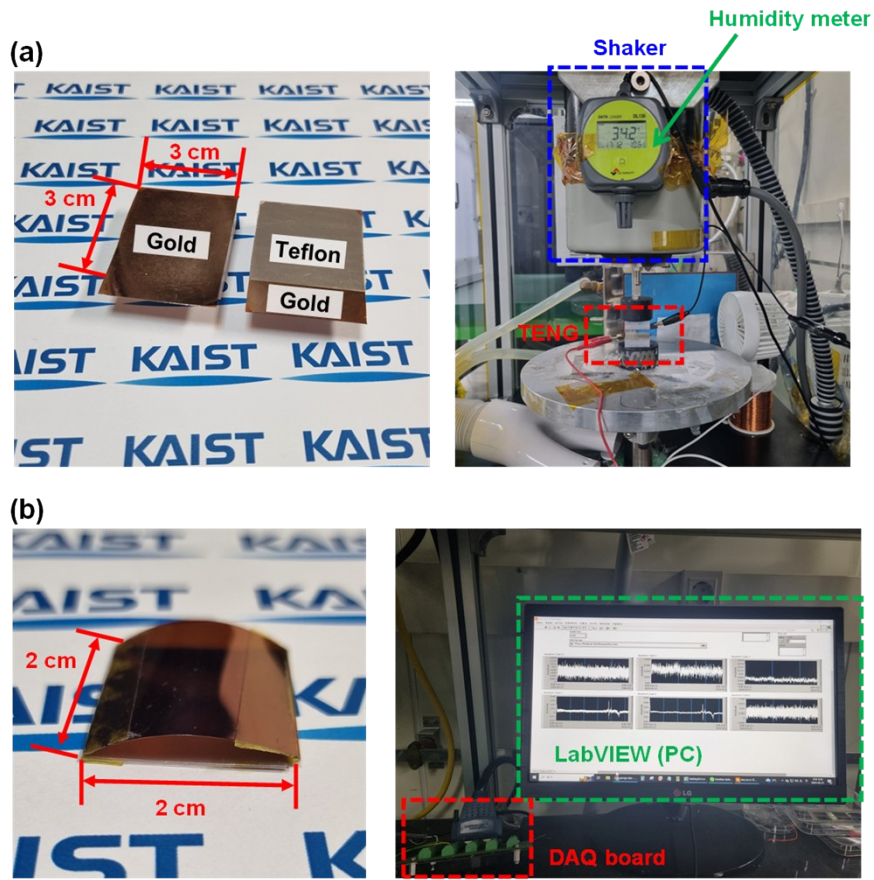

**Figure S1.** (a) Photographs of the CN-TENG and corresponding experimental bench to evaluate performances of prototyped CN-TENG. (b) Photographs of the CN-TENG and corresponding experimental bench for gait analyses.

## 2. Fabrication procedure of nanopatterns with BCP self-assembly

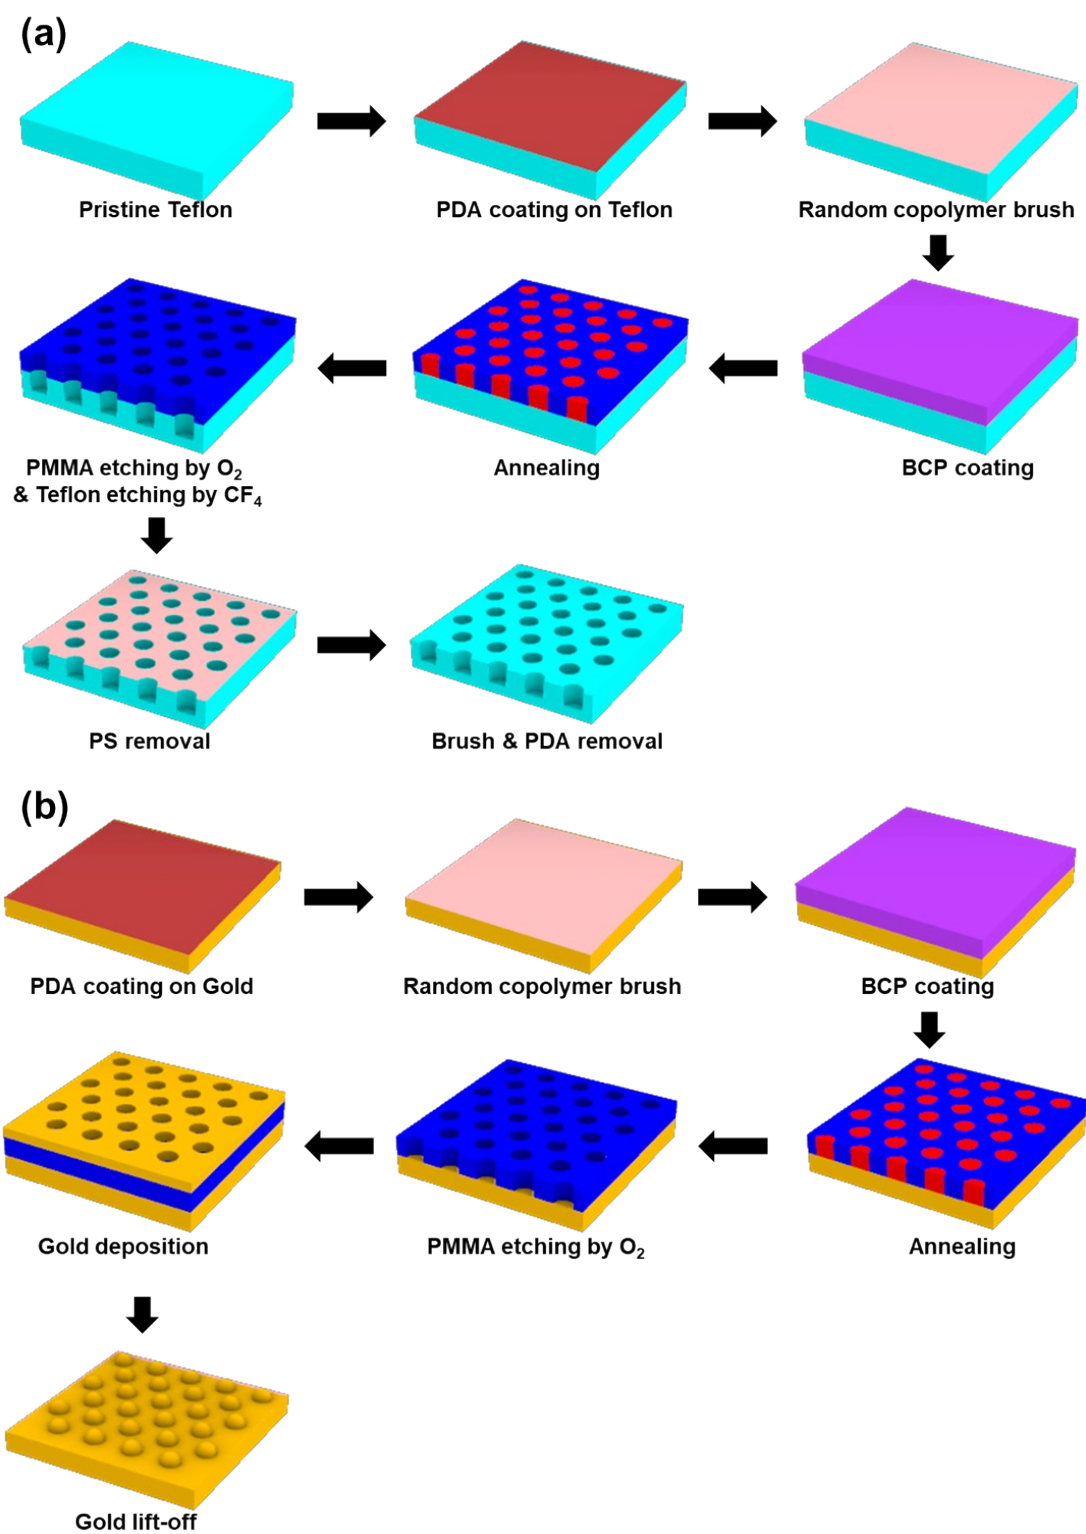

**Figure S2.** Detailed fabrication procedure to make nanopatterns with BCP self-assembly. (a)

Indented nanopores on Teflon. (b) Protruded nanodots on gold.



### 3. 6-inch wafer-scale fabrication of BCP

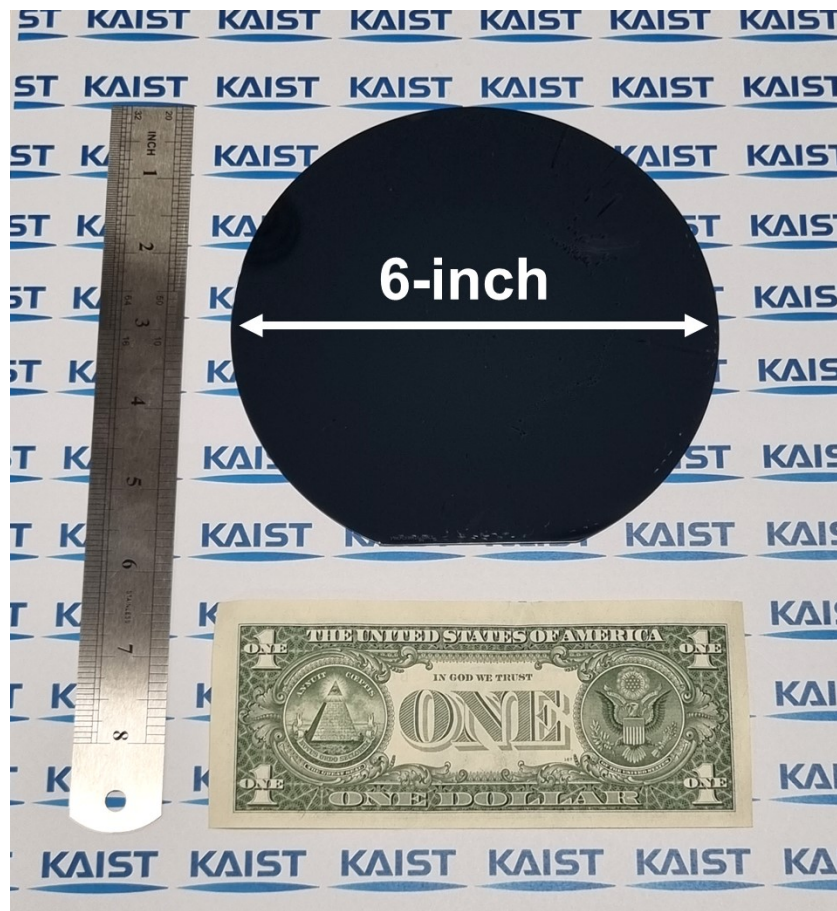

**Figure S3.** Fabricated BCP on a 6-inch Si wafer. By using BCP self-assembly, nanopatterns could be fabricated in wafer-scale.

#### 4. Fast Fourier transform (FFT) images for various nanopatterns

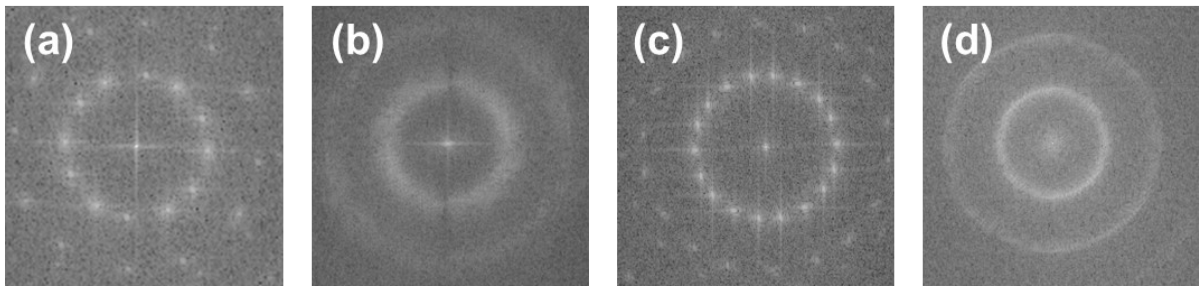

**Figure S4.** FFT analysis of nanopatterns. (a) Indented nanopores on Teflon and (b) indented nanotrenches on Teflon after PMMA etching with  $O_2$ . (c) Protruded nanodots on gold and (d) protruded nanowires on gold after gold deposition and lift-off.

## 5. Intensity of grazing-incidence small-angle X-ray scattering (GISAXS) from nanopatterns

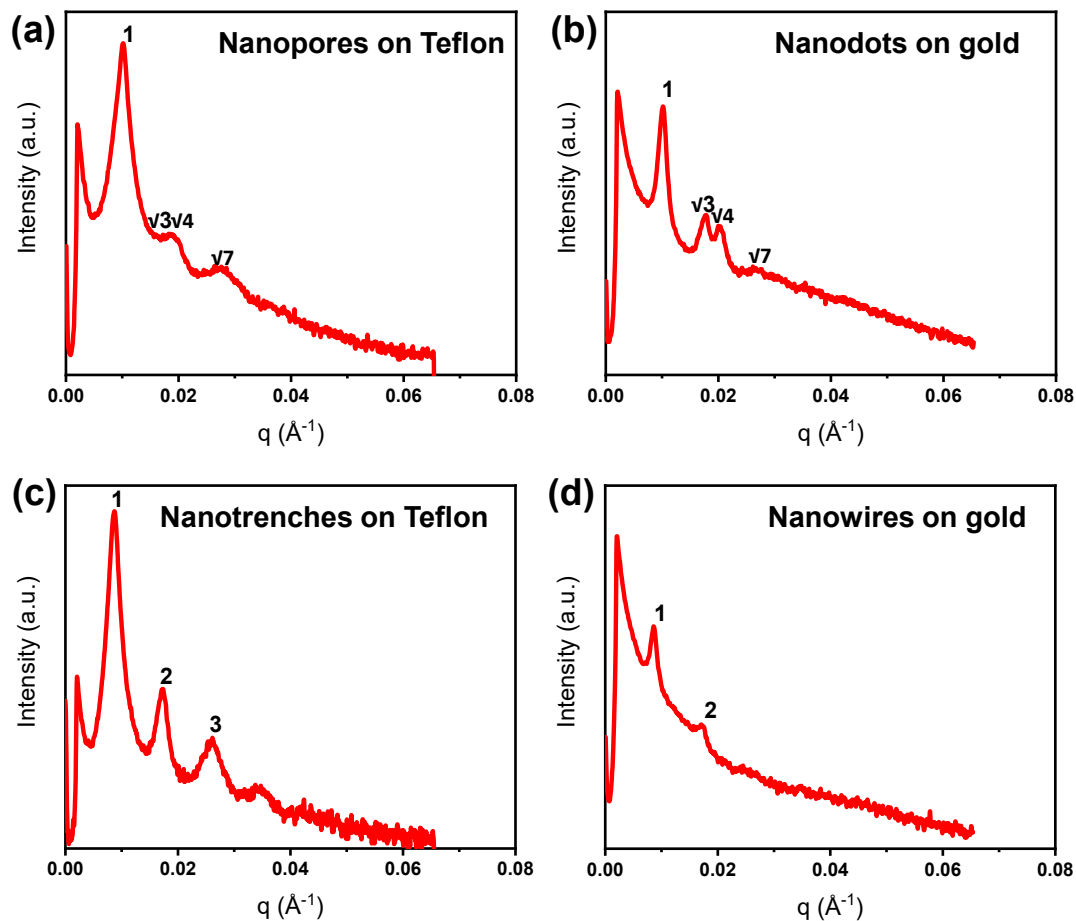

**Figure S5.** GISAXS intensity vs.  $q$ -plot for (a) indented nanopores on Teflon, (b) protruded nanodots on gold, (c) indented nanotrenches on Teflon, and (d) protruded nanowires on gold.

## 6. Analyses of nanopatterns on Teflon with X-ray photoelectron spectroscopy (XPS)

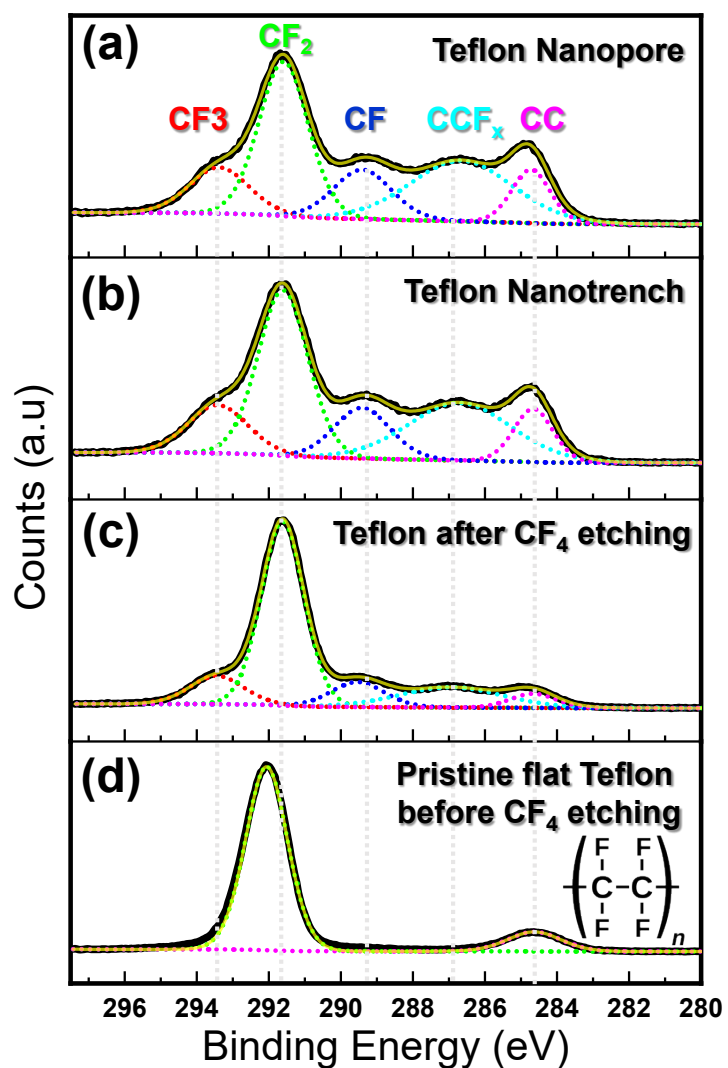

**Figure S6.** Energy spectra obtained from XPS for various nanopatterns. (a) Nanopores on Teflon. (b) Nanotrenches on Teflon. (c) Etched Teflon after  $CF_4$  etching. (d) Pristine flat Teflon before  $CF_4$  etching.



## 7. The effect of etching on TENG performances

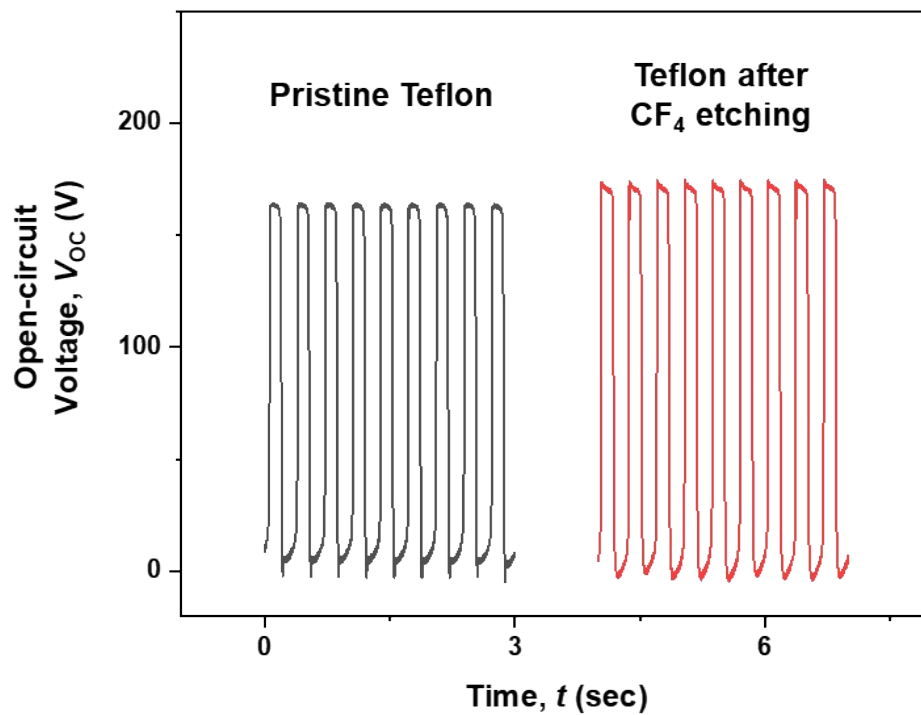

**Figure S7.**  $V_{OC}$  of TENGs with pristine smooth Teflon and roughened Teflon after  $CF_4$  etching.

There was almost no difference between the two TENGs.

## 8. Measurement conditions for the TENG characterization

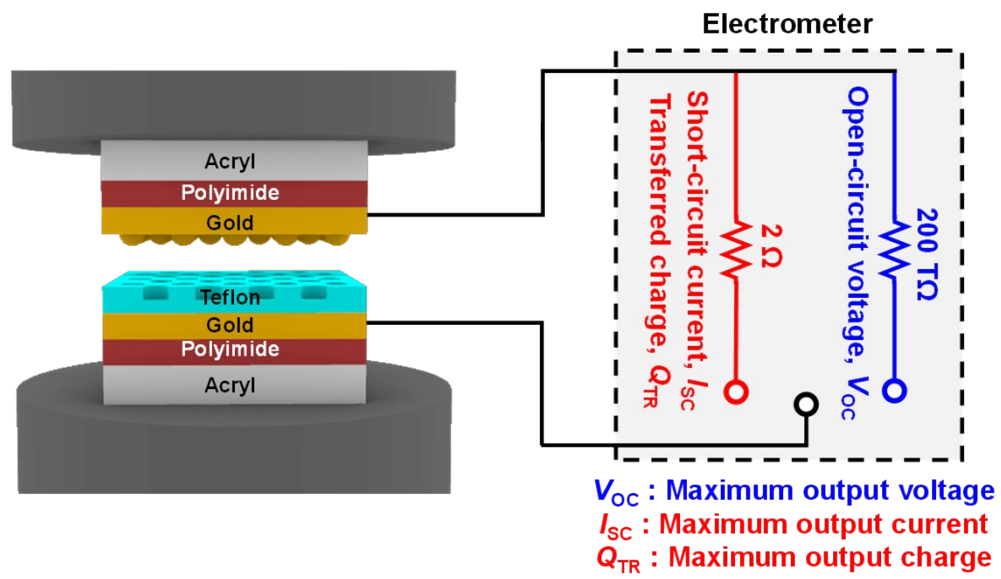

**Figure S8.** Measurement setup for characterization of TENGs.

## 9. Electrical output performances ( $\eta$ ) according to contact area factor

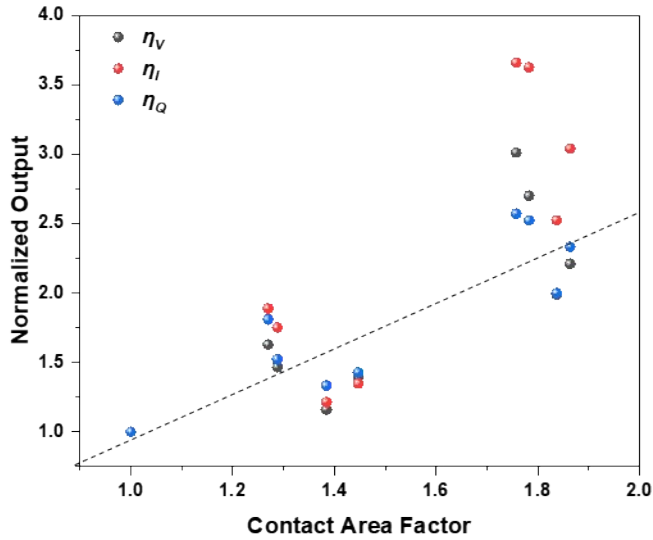

$$\eta_V = \frac{V_{OC}(\text{Pattern})}{V_{OC}(\text{No Pattern})}$$

$$\eta_I = \frac{I_{SC}(\text{Pattern})}{I_{SC}(\text{No Pattern})}$$

$$\eta_Q = \frac{Q_{TR}(\text{Pattern})}{Q_{TR}(\text{No Pattern})}$$

**Figure S9.** Electrical output performances quantified as normalized output ( $\eta$ ) according to the contact area factor. The normalized open-circuit voltage ( $\eta_V$ ), short-circuit current ( $\eta_I$ ), and transferred charge ( $\eta_Q$ ) with pattern over those without pattern are defined by the equations above. The contact area factor was calculated as the product of the contact area increased due to the protrusion of the gold and the contact area increased due to the indentation of the Teflon.

## 10. Frequency effect on electrical outputs

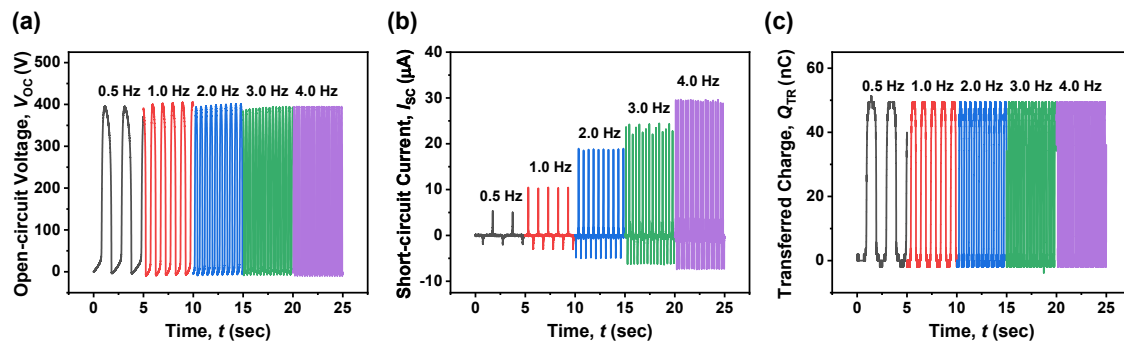

**Figure S10.** (a) Measured  $V_{OC}$  from the CN-TENGs with different frequencies from 0.5 Hz to 4.0 Hz. (b) Measured  $I_{SC}$ . (c) Measured  $Q_{TR}$ .

## 11. Demonstration of LED lighting with CN-TENG

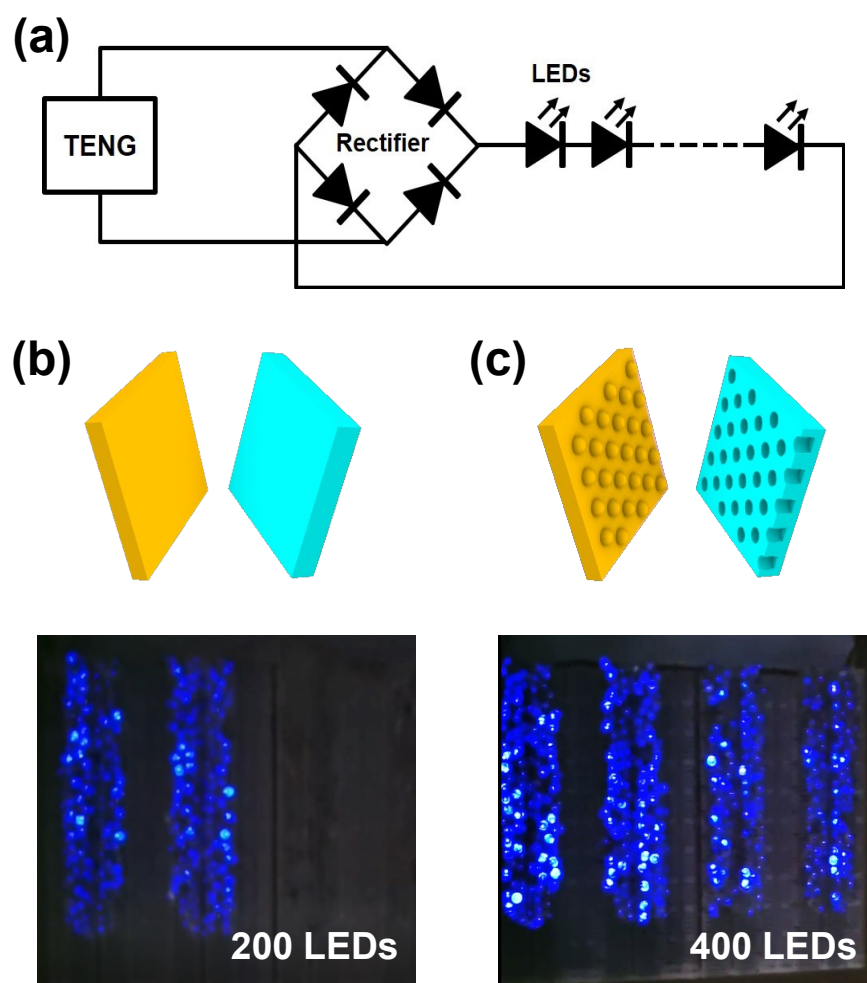

**Figure S11.** (a) Circuit diagram for LED lighting by CN-TENG. (b) Schematic illustration and optical photograph showing 200 illuminated LEDs by power generated from TENG without nanopatterns (No Pattern). (c) Schematic illustration and optical photograph showing 400 illuminated LEDs by power generated from CN-TENG with gold nanodots and Teflon nanopores (Pattern-6).

## 12. Size effect of complementary nanopatterns on electrical outputs

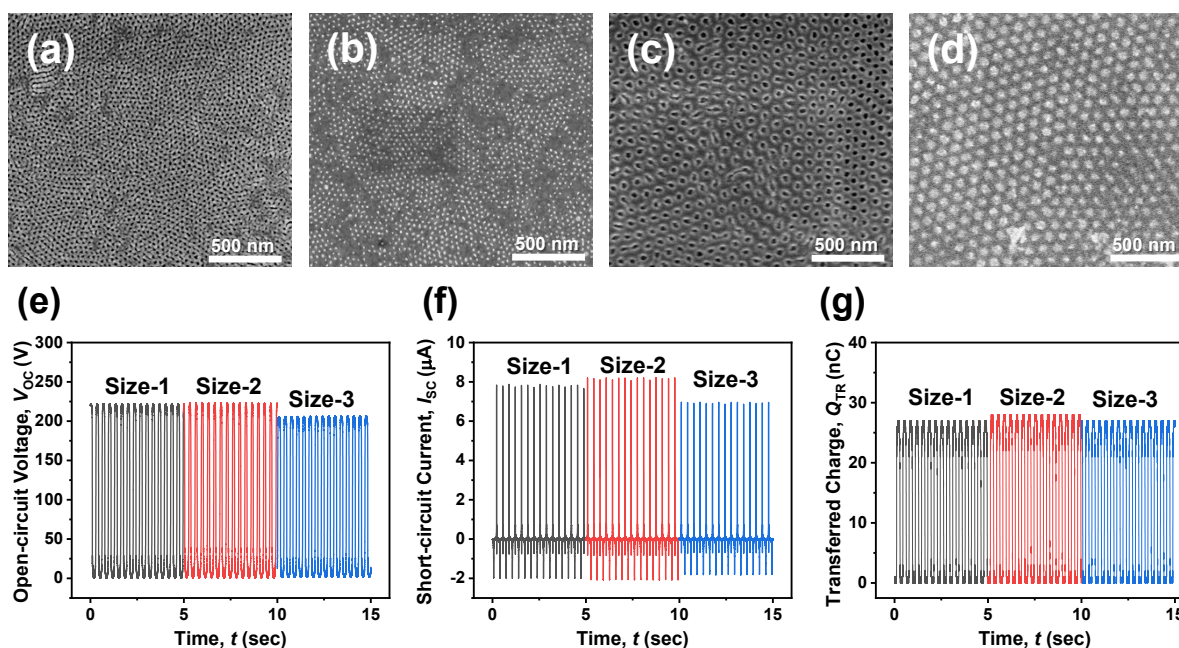

**Figure S12.** (a) SEM image of Tefflon nanopores fabricated by BCP with PS of 46.1 kg/mol and PMMA of 21 kg/mol (Size-1). (b) SEM image of gold nanodots fabricated by BCP with PS of 46.1 kg/mol and PMMA of 21 kg/mol (Size-1). (c) SEM image of Tefflon nanopores fabricated by BCP with PS of 328 kg/mol and PMMA of 173 kg/mol (Size-3). (d) SEM image of gold nanodots fabricated by BCP with PS of 328 kg/mol and PMMA of 173 kg/mol (Size-3). (e) Measured  $V_{OC}$  from the CN-TENGs with Size-1 to Size 3 listed in **Table S2**. (f) Measured  $I_{SC}$ . (g) Measured  $Q_{TR}$ .

### 13. Classification accuracy according to the number of epochs

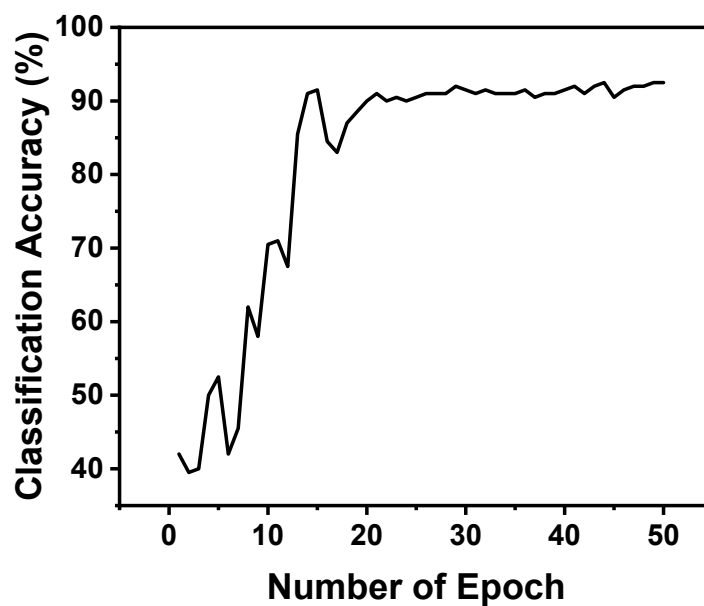

**Figure S13.** Classification accuracy as a function of the number of training epochs.

**Table S1.** Various CN-TENGs and TENGs of 9 combinatorial pattern-pairs among flat gold, gold nanodots, gold nanowires, flat Teflon, Teflon nanopores, and Teflon nanotrenches. For gold nanodots and Teflon nanopores, PS with  $M_w$  of 132 kg/mol and PMMA with  $M_w$  of 68 kg/mol were used. For gold nanowires and Teflon nanotrenches, PS with  $M_w$  of 105 kg/mol and PMMA with  $M_w$  of 106 kg/mol were used.

| <b>TENG Type</b> | <b>Gold</b>            | <b>Teflon</b>          | <b>Remark</b>                              |
|------------------|------------------------|------------------------|--------------------------------------------|
| No Pattern       | Flat (without pattern) | Flat (without pattern) | TENG with both flat surfaces               |
| Pattern-1        | Nanowires              | Flat (without pattern) | TENG with rough surface on single-side     |
| Pattern-2        | Nanodots               | Flat (without pattern) |                                            |
| Pattern-3        | Flat (without pattern) | Nanopores              |                                            |
| Pattern-4        | Flat (without pattern) | Nanotrenches           |                                            |
| Pattern-5        | Nanowires              | Nanopores              | CN-TENG with rough surface on double-sides |
| Pattern-6        | Nanodots               | Nanopores              |                                            |
| Pattern-7        | Nanowires              | Nanotrenches           |                                            |
| Pattern-8        | Nanodots               | Nanotrenches           |                                            |



**Table S2.** Various CN-TENGs of 3 combinatorial size-pairs between gold nanodots and Teflon nanopores. To control a size of a gold nanodot and a Teflon nanopore, various  $M_w$  of PS and PMMA were used.

| <b>TENG Type</b> | <b>Gold nanodot<br/>(<math>M_w</math> of PS : <math>M_w</math> of PMMA)<br/>[kg/mol]</b> | <b>Teflon nanopore<br/>(<math>M_w</math> of PS : <math>M_w</math> of PMMA)<br/>[kg/mol]</b> | <b>Remark</b> |
|------------------|------------------------------------------------------------------------------------------|---------------------------------------------------------------------------------------------|---------------|
| Size-1           | 46.1 : 21                                                                                | 46.1 : 21                                                                                   | Small         |
| Size-2           | 132 : 68                                                                                 | 132 : 68                                                                                    | Medium        |
| Size-3           | 328 : 173                                                                                | 328 : 173                                                                                   | Large         |
